1

2

3

4

5 **Sixteen years of innovation in youth mental healthcare in Australia: Outcomes**  
6 **for young people attending headspace centre services**

7

8

9 Debra Rickwood<sup>1,2\*</sup>, Juliet McEachran<sup>2</sup>, Anna Saw<sup>2</sup>, Nic Telford<sup>2</sup>, Jason Trethowan<sup>2</sup>,  
10 Patrick McGorry<sup>3</sup>

11

12 <sup>1</sup> Faculty of Health, University of Canberra, Canberra, Australian Capital Territory,  
13 Australia

14 <sup>2</sup> headspace National Youth Mental Health Foundation, Melbourne, Victoria,  
15 Australia

16 <sup>3</sup> Orygen Centre of Excellence in Youth Mental Health, University of Melbourne,  
17 Melbourne, Victoria, Australia

18

19 \* Corresponding author

20 E-mail: [debra.rickwood@canberra.edu.au](mailto:debra.rickwood@canberra.edu.au)

21

22

23

## 24 **Abstract**

25 Australia's headspace initiative is world-leading in nation-wide youth mental  
26 healthcare reform for young people aged 12 to 25 years, now with 16 years of  
27 implementation. This paper examines changes in the key outcomes of psychological  
28 distress, psychosocial functioning, and quality of life for young people accessing  
29 headspace centres across Australia for mental health problems. The design was a  
30 single-arm, observational study using routinely collected data from headspace clients  
31 commencing an episode of care between 1 April 2019 and 30 March 2020, and at 90-  
32 day follow-up. All 108 of the fully established headspace centres across Australia  
33 were included, with 58,233 young people aged 12-25 years first accessing headspace  
34 centres for mental health problems during the data collection period. Main outcome  
35 measures were self-reported psychological distress and quality of life, and clinician-  
36 reported social and occupational functioning. Most headspace mental health clients  
37 presented with depression and anxiety issues (75.21%). There were 35.27% with a  
38 diagnosis: 21.74% diagnosed with anxiety, 18.51% with depression, and 8.60% were  
39 sub-syndromal. Cognitive behavioural therapy was the most common treatment.  
40 There were significant improvements in all outcome scores over time ( $P < 0.001$ ).  
41 From presentation to last service rating, over one-third of young people had  
42 significant improvements in psychological distress and a similar proportion in  
43 psychosocial functioning; just under half improved in self-reported quality of life.  
44 Significant improvement on any of the three outcomes was shown for 70.96% of  
45 headspace mental health clients. After 16 years of headspace implementation, positive  
46 outcomes are being achieved, particularly when multi-dimensional outcomes are  
47 considered. A suite of outcomes that capture meaningful change for young people's  
48 quality of life, distress and functioning, is critical for early intervention, primary care  
49 settings with diverse client presentations, like the headspace youth mental healthcare  
50 initiative.  
51

## 52 **Introduction**

53 The mental health of young people in their teenage and early adult years is a  
54 major concern world-wide, due to the high and increasing prevalence of mental health  
55 problems at this time of life [1]. Concern has escalated in the context of the  
56 disproportionate impact of COVID-19 on this demographic group through major  
57 disruptions to their studies, work opportunities, and social relationships [2]. An  
58 international movement for youth mental health services, tailored specifically to the  
59 needs of the 12-25-year age range, emerged around 20 years ago and has expanded  
60 rapidly [3]. Australia was one of the first countries to invest in national reform by

61 creating a new health service platform for young people through headspace: the  
62 National Youth Mental Health Foundation [4]. headspace now comprises the largest  
63 national network of enhanced primary care, youth mental health services, world-wide,  
64 with over 135 headspace centres across Australia [5]. Similar service approaches in  
65 youth mental healthcare are being implemented in many other countries, including  
66 Ireland, Canada, Denmark, Israel, the United Kingdom, and parts of the United States  
67 [6].

68 headspace commenced in 2006, funded by the Australian Government, with  
69 the first 10 centres established in 2007. Centres have continued to be implemented  
70 over the past 16 years, and there are currently 149 centres open across Australia  
71 (headspace communication 6 April 2022). This upscaling has been in response to  
72 strong support from communities and vocal advocacy to have centres established in  
73 local areas, as well as bi-partisan support from the Australian Government. The  
74 headspace centre network has been further augmented by the introduction of online  
75 services in 2011 (ehespace), early psychosis services in some locations from 2014,  
76 online work and study support since 2016 and, more recently, centre service  
77 innovations such as satellites and remote outreach. All of these different ways to  
78 expand capacity in youth mental healthcare have been necessary to reach and address  
79 the varied needs of young people in diverse communities across the wide expanse of  
80 Australia [7].

81 The foundation of the headspace initiative is the headspace centre network.  
82 headspace centres have been co-designed with young people to break down the  
83 barriers that young people typically experience to accessing in-person mental  
84 healthcare, including lack of mental health literacy and uncertainty regarding need,  
85 stigma, fears about confidentiality, cost, and poor experiences of care [4, 8]. Centres

86 provide easy-access, youth-friendly, integrated primary care services, with four core  
87 streams of service delivery to holistically address the main health and wellbeing needs  
88 for young people aged 12-25 years—mental health, physical and sexual health,  
89 alcohol and other drugs, and work and study issues. The centre model was designed  
90 primarily for young people with mild to moderate common mental health problems,  
91 and to encourage them to seek help early in the development of problems.  
92 Notwithstanding, centres have a ‘no wrong door’ approach so that young people are  
93 supported to access support as early and easily as possible whatever their mental  
94 health status. This recognises that young people at all stages of illness experience  
95 significant access barriers to mental healthcare. Importantly, young people can self-  
96 refer or be referred by other services or by family and friends.

97         The headspace centre model comprises 16 core components, including 10  
98 service components (e.g., youth participation, family and friends participation,  
99 community awareness, early intervention, supported transitions) and six enabling  
100 components (e.g., blended funding, monitoring and evaluation, national network),  
101 which are more fully described elsewhere see [9]. Briefly, the key innovations of the  
102 model, embraced by the youth mental healthcare movement internationally, include  
103 the focus on the 12-25-year age range, rather than the traditional child and adolescent  
104 (under 18 years) versus adult (18-65 years) demarcation for mental health services.  
105 Youth participation and engagement are prioritised at all levels, including young  
106 people driving decisions about their own care; youth input to service design, delivery  
107 and evaluation; and the embedded involvement of young people in governance  
108 processes. The participation of family and friends is also prioritised and actively  
109 supported. Centres must bring together access to the four core streams of service  
110 delivery in one location, and within a primary care focus, although strong integration

111 with secondary and tertiary services is also required. Youth-friendliness/focus is  
112 recognised as critical. This is achieved through young people’s input during  
113 establishment and maintenance of the service; by ensuring that the look and feel of the  
114 centre is welcoming, positive and engaging for young people; that young people feel  
115 accepted and respected for who they are; and that the service is designed around the  
116 needs of young people in the local community. Two additional priorities are  
117 particularly unusual for mental healthcare. These are a requirement for community  
118 awareness activities, which are specifically funded to improve mental health literacy  
119 and pathways to care for young people in the local community; and brand adherence,  
120 which is strongly promoted and carefully maintained to ensure fidelity and credibility.

121 The effectiveness of headspace and the impact of the Australian Government’s  
122 investment into the initiative are of considerable interest in Australia and world-wide.  
123 headspace centres have undergone three external evaluations funded by government.  
124 A preliminary external evaluation in 2009 of the first 30 centres showed that young  
125 people found the approach to be acceptable [10]. A 2015 evaluation reported that  
126 centres: were highly accessible and utilised by a diverse range of young people with  
127 high psychological distress; facilitated access for young people living outside major  
128 cities; demonstrated a statistically significant small program effect; and that young  
129 people whose mental health improved also had positive economic and social  
130 outcomes and reduced suicidal ideation [11]. A third government-commissioned  
131 external evaluation will be completed in 2022, and preliminary drafts show continued  
132 strong youth and community support.

133 Importantly, none of these well-resourced external evaluations have been able  
134 to identify an appropriate control or comparison group. Given that headspace is a  
135 government-funded, real-world, service system innovation, which is delivering

136 currently available evidence-based mental healthcare, and being rapidly scaled up to  
137 meet the high level of need and demand across Australia, randomised trials are neither  
138 feasible nor appropriate. Comparative data from young people accessing no care or  
139 other types of care are very difficult to attain or are not appropriate comparators. The  
140 closest comparator in Australia has been the Access to Allied Psychological Services  
141 (ATAPS) initiative, also government funded. A comparative study, using routinely  
142 collected data from 2009-2012, concluded that ATAPS and headspace both delivered  
143 free or low-cost psychological services to 12-25 year-olds with different  
144 characteristics, and that both had promising effects on mental health, filling a service  
145 gap for young people in a complementary way [12]. Into the future, however, the  
146 best comparisons will be with findings from other similar services being implemented  
147 internationally.

148 Notably, headspace has prioritised internal evaluation from the outset,  
149 introducing an innovative routine data collection system in 2013 to gather information  
150 from all young people accessing centres and their service providers at each occasion  
151 of service, and attempting to follow-up young people 90 days after service exit. These  
152 data have been used to describe the characteristics and presenting issues of young  
153 people accessing centres[13], the services provided to them [14], as well as an early  
154 report of key outcomes [15].

155 Determining appropriate outcomes, which can be collected routinely for a  
156 large cohort of young people with very diverse demographic characteristics, clinical  
157 presentations, and service needs, is a challenging task. A systematic review of  
158 literature published up until mid-2014 revealed no mental health outcome measures  
159 designed specifically for the 12-25-year age range [16]. The review also highlighted  
160 the many different facets of mental health that could be the focus of outcome

161 measurement, including measures of disorder-specific symptoms, global cognition  
162 and emotion measures, functioning, quality of life, recovery, as well as  
163 multidimensional constructs.

164 headspace initially implemented, as key outcome measures, a self-reported  
165 measure of psychological distress, the Kessler 10 Psychological Distress Scale (K10  
166 [17]), and a clinician-reported measure of social and occupational functioning, the  
167 Social and Occupational Functioning Assessment Scale (SOFAS [18]). These were  
168 included based on the requirements for government funding, and widespread  
169 consultation with the headspace network to determine brief, global assessments of  
170 mental health status relevant to young people.

171 An initial outcomes analysis was published in 2015 [15] based on these two  
172 measures. In that study, we analysed the K10 and SOFAS scores for 24,034 young  
173 people commencing an episode of care between 1 April 2013 and 31 March 2014 for  
174 mental health problems at one of the 55 then-established centres [15]. Results showed  
175 that over one-third of young people had significant improvements in psychological  
176 distress (K10) and a similar proportion improved in psychosocial functioning  
177 (SOFAS); 60% showed significant improvement on either measure.

178 Subsequently, to fill the gap of no young-person centric, global, mental health  
179 outcome measure, headspace co-developed with headspace young people and service  
180 providers, a measure called MyLifeTracker (MLT) [19]. This is a brief self-report  
181 measure of quality of life in five domains of importance for young people, which can  
182 be used for routine outcome monitoring and measurement informed treatment, as well  
183 as for tracking outcomes at the service level [20]. Although still not sufficiently  
184 comprehensive to capture the diverse nature of early intervention outcomes for youth  
185 mental healthcare, the three measures of self-reported quality of life (MLT), self-

186 reported psychological distress (K10), and clinician-reported social and occupational  
187 functioning (SOFAS), altogether, comprise a suite of outcome measures appropriate  
188 for routine collection within headspace centre services that provide information about  
189 change in the relevant, multiple dimensions of distress, quality of life, and  
190 functioning.

191 The headspace centre network is now 16 years old, with over 700,000 young  
192 Australians having received services since its inception [5]. The current study aims to  
193 describe multi-dimensional outcomes for young people accessing mental healthcare at  
194 headspace centres in terms of changes in their psychological distress, quality of life,  
195 and social and occupational functioning. We examine significant change, reliable  
196 change, and clinically significant change scores, as increasingly conditional indicators  
197 of change, for the three outcomes. Describing the nature of the outcomes being  
198 achieved by headspace centre services in Australia contributes to the growing  
199 international literature in youth mental healthcare models and provides comparative  
200 data for similar services internationally.

## 201 **Method**

### 202 **Participants**

203 Participants were all young people who commenced and completed an episode  
204 of care at a headspace centre for mental health reasons between 1 April 2019 and 30  
205 March 2020. We selected this time period to avoid the impact of COVID-19 on both  
206 clients, themselves, and the routine program data collection. Like many services,  
207 headspace was severely impacted by COVID-19 restrictions, including having to  
208 deliver services exclusively online and via phone in many areas for considerable



209 periods of time. This caused difficulties collecting data from young people in the  
210 changed service delivery circumstances.

211 Only young people who attended mental health services were included. Young  
212 people can also attend headspace for situational, physical or sexual health, alcohol or  
213 other drug, and vocational reasons without needing to access mental health care, so  
214 young people with these reasons for presentation were excluded (n=18631). Figure 1  
215 shows the sample numbers at each point of the data selection process.

216

217 **Fig 1. Number of clients by each data selection process.**

218

219 This yielded an overall sample of 58233 clients across the 108 headspace  
220 centres that were fully operational during the data collection period. The majority of  
221 clients were female (61.34%), 36.96% were male, and 1.70% were intersex or  
222 transgender. Average age was 17.43 years (SD=3.48), with 24.27% aged 12-14,  
223 30.07% aged 15-17, 23.32% aged 18-20, and 22.33% aged 21-25 years.

## 224 **Procedure**

225 The design was a single-arm, observational study using routinely collected  
226 service data. headspace collects a minimum data set (MDS) from young people and  
227 their service providers at every occasion of service [21]. Young people are asked to  
228 complete a series of questions while waiting for their service visit; this is usually done  
229 on a tablet device or at a stand-alone computer located in part of the reception area  
230 that gives privacy for data entry. Young people are directed to the data collection  
231 process by reception staff, unless they require support to enter their information, in  
232 which case they are assisted by a service provider if they agree to this. Service

233 providers enter data about each occasion of service into the MDS system after each  
234 service.

235 Follow-up data on psychological distress are collected after a 90-day break in  
236 service provision from young people who volunteer when they first attend headspace  
237 to participate in a follow-up questionnaire. Those who agree are emailed or texted a  
238 follow-up questionnaire to self-complete. There were 4.08% (n=1574) of eligible  
239 young people who responded to the follow-up survey.

240 All the routinely collected MDS data from every headspace centre are stored  
241 in secure data warehouse, and anonymous data for each client at each occasion of  
242 service are available to headspace National research and evaluation staff for analysis.

243 Ethical approval was obtained from Melbourne Health Quality Assurance  
244 Review and the headspace Data Governance Reference Group.

## 245 **Measures**

246 Demographic characteristics of gender and age were self-reported or  
247 completed by clinicians at first visit. Gender options included: male, female, and  
248 gender diverse (comprising 8 categories). Age was determined by date of birth and  
249 categorised into early adolescence (12-14 years), mid-adolescence (15-17 years), late  
250 adolescence (18-20 years), and early adulthood (21-25 years).

251 Clinical characteristics of the clients were determined by clinicians at each  
252 visit, and included: primary presenting issue, indicated on a list of 13 mental health  
253 and behaviour concerns (including an open-ended ‘other’ category); primary and  
254 other diagnosis based on DSM-V categories; mental health risk status, indicating  
255 whether the young person had ‘No risk factors or symptoms of mental health  
256 problems’, ‘Risk factors present’, ‘Sub-threshold symptoms’, ‘Threshold diagnosis -

257 first episode’, or ‘Threshold diagnosis - ongoing mental disorder’; and type of  
258 treatment, determined via a list of 50 treatment types.

259 Client outcomes were: psychological distress, self-reported through the 10-  
260 item Kessler Psychological Distress Scale (K10)[17]; overall psychosocial  
261 functioning, assessed by service providers using the single-item Social and  
262 Occupational Functioning Assessment Scale (SOFAS)[18]; and a self-reported quality  
263 of life measure developed specifically for youth mental health services, the 5-item  
264 MyLifeTracker (MLT)[19]. Psychological distress is self-reported immediately before  
265 young people’s first to fourth, seventh, eleventh, and fifteenth visits, and at 90-day  
266 follow-up; quality of life is self-reported at every visit; and psychosocial functioning  
267 is recorded by service providers at every visit.

## 268 **Statistical Analyses**

269 Significance was set at  $P < 0.001$  to exclude trivial effects being significant due  
270 to high statistical power.

271 Changes in outcomes were assessed in two ways [22]. First, mixed-design  
272 analysis of variance (ANOVA) determined change over time in K10, SOFAS and  
273 MLT scores by time (first/last assessment), number of sessions, age-group  
274 (early/mid/late adolescence and early adulthood) and gender (male/female; the gender  
275 diverse group was not included in analyses due to small sample sizes in the groups).  
276 Associations between outcome scores were determined with Pearson’s correlation  
277 coefficient. Logistic regression examined differences between those who did and did  
278 not achieve significant improvement on K10, MLT or SOFAS and those who did or  
279 did not provide follow-up data.

280 Second, significant change, reliable change, and clinically significant change  
281 scores were calculated for each of the three outcomes, as increasingly conditional

282 indicators of change. Significant change was determined by a change with at least a  
283 moderate effect size (0.5). The Jacobson and Truax method [23] was used to  
284 determine reliable change (RCI) (indicating reliable improvement or decline) and  
285 clinically significant change (CSI) (cut-off point at which the young person is more  
286 likely to belong to a non-clinical than clinical population). The RCI and CSI for the  
287 K10 and SOFAS were calculated as for the 2015 analysis: RCI=7 and 10, CSI=23 and  
288 69, respectively [15]. For MLT, these were RCI=18.27, CSI=63.86 [19, 20].

## 289 **Results**

### 290 **Clinical characteristics and treatment services**

291 The most common primary presenting issues were anxiety symptoms  
292 (41.85%) followed by depression symptoms (33.36%), together accounting for three-  
293 quarters of primary presenting concerns (see Table 1). This was evident for all age  
294 and gender groups, except 12-14 year-old boys, whose second most common  
295 presenting issue was anger issues (23.36%).

296 **Table 1. Percentage of young people with each primary presenting issue by**  
 297 **gender and age-group.**

| Age           | n     | Anxiety symptoms | Depression symptoms | Anger Issues | Stress related | Suicidal thoughts/behaviour | disruptive behavioural issues | Difficulties with personal relationships | Conflict in home environment | Borderline personality traits | Eating disorder |
|---------------|-------|------------------|---------------------|--------------|----------------|-----------------------------|-------------------------------|------------------------------------------|------------------------------|-------------------------------|-----------------|
| <b>Female</b> |       |                  |                     |              |                |                             |                               |                                          |                              |                               |                 |
| 12-14         | 7062  | 46.12            | 26.90               | 8.61         | 5.44           | 3.40                        | 2.11                          | 2.25                                     | 3.41                         | 0.34                          | 1.36            |
| 15-17         | 9321  | 44.50            | 34.32               | 3.75         | 6.00           | 2.84                        | 0.75                          | 1.87                                     | 2.42                         | 1.52                          | 2.02            |
| 18-20         | 7167  | 45.22            | 34.70               | 2.05         | 6.60           | 2.51                        | n/a                           | 1.88                                     | 1.16                         | 3.38                          | 2.13            |
| 21-25         | 6307  | 44.47            | 34.75               | 2.24         | 7.15           | 1.81                        | n/a                           | 2.51                                     | 0.73                         | 3.95                          | 2.01            |
| <b>Male</b>   |       |                  |                     |              |                |                             |                               |                                          |                              |                               |                 |
| 12-14         | 4221  | 34.66            | 21.37               | 23.36        | 5.33           | 2.11                        | 8.22                          | 1.99                                     | 3.10                         | 0.07                          | n/a             |
| 15-17         | 5089  | 34.60            | 35.53               | 12.7         | 6.92           | 3.30                        | 2.97                          | 1.69                                     | 1.89                         | n/a                           | n/a             |
| 18-20         | 4067  | 39.32            | 39.56               | 6.96         | 5.88           | 3.49                        | 1.08                          | 1.89                                     | 0.64                         | 0.79                          | n/a             |
| 21-25         | 4213  | 37.43            | 41.11               | 6.74         | 6.34           | 2.71                        | 0.88                          | 2.60                                     | 0.71                         | 1.09                          | n/a             |
| <b>Total</b>  |       |                  |                     |              |                |                             |                               |                                          |                              |                               |                 |
| 12-25         | 47447 | 41.85            | 33.36               | 7.26         | 6.22           | 2.77                        | 1.79                          | 2.01                                     | 1.85                         | 1.59                          | 1.31            |

Notes: Total sample size differs from total possible sample size of 58223 due to missing data on gender and age, and the exclusion of 'gender diverse' due to small cell sizes. n/a cell size<30.

298 Mental health risk status (Table 2), which shows the highest level of risk  
 299 recorded across the episode of care, revealed that almost a quarter (23.57%) had no  
 300 indicated risk factors or symptoms of mental health problems; most of these young  
 301 people attended only an initial consultation and did not progress to receiving  
 302 treatment services. Another quarter (25.64%) had identified risk factors; one fifth  
 303 (21.01%) had sub-threshold symptoms; 11.77% were first episode; and 18.01% had  
 304 full-threshold diagnosis with ongoing mental disorder.

305 **Table 2. Mental health risk status.**

| Mental health risk status                             | Young people presenting with mental health and behavioural issues |              |
|-------------------------------------------------------|-------------------------------------------------------------------|--------------|
|                                                       | n                                                                 | %            |
| No risk factors or symptoms or mental health problems | 13724                                                             | 23.57        |
| Risk factors present                                  | 14928                                                             | 25.64        |
| Sub-threshold symptoms                                | 12230                                                             | 21.01        |
| Threshold diagnosis – first episode                   | 6856                                                              | 11.77        |
| Threshold diagnosis – ongoing mental disorder         | 10458                                                             | 18.01        |
| <b>Total</b>                                          | <b>58223</b>                                                      | <b>100.0</b> |

306 Consistent with risk status, Table 3 shows that no diagnosis was made for two-  
307 thirds of clients (64.71%), including 14.31% with diagnosis not yet assessed and  
308 8.60% who were sub-syndromal. For those with a diagnosis, the most common was  
309 anxiety disorder (21.74%) followed by depressive disorder (18.51%), then trauma  
310 (5.64%), personality disorder (2.34%) and disruptive behaviour (2.03%). All other  
311 diagnoses were proportionally very rare.

312 **Table 3. Any diagnosis during the episode of care.**

| Diagnosis                                                                                   | Young people presenting with mental health and behavioural issues |              | Young people with at least 2 outcome measures for K10/MLT or SOFAS |             |
|---------------------------------------------------------------------------------------------|-------------------------------------------------------------------|--------------|--------------------------------------------------------------------|-------------|
|                                                                                             | n                                                                 | %            | n                                                                  | %           |
| Missing                                                                                     | 6                                                                 | 0.01         | 2                                                                  | 0.0         |
| Not applicable (diagnosis not relevant or service provider not qualified to give diagnosis) | 23433                                                             | 40.24        | 9615                                                               | 37.0        |
| Diagnosis not yet assessed                                                                  | 8332                                                              | 14.31        | 4218                                                               | 16.2        |
| No diagnosis and no sub-syndromal symptoms                                                  | 897                                                               | 1.54         | 427                                                                | 1.6         |
| No diagnosis but sub-syndromal mental health problems                                       | 5008                                                              | 8.60         | 2170                                                               | 8.3         |
| <b>Total no diagnosis</b>                                                                   | <b>37421</b>                                                      | <b>64.71</b> | <b>16432</b>                                                       | <b>63.2</b> |
| Anxiety                                                                                     | 12663                                                             | 21.74        | 3993                                                               | 15.4        |
| Depression                                                                                  | 10777                                                             | 18.51        | 3398                                                               | 13.1        |
| Trauma                                                                                      | 3284                                                              | 5.64         | 918                                                                | 3.5         |
| Personality disorder                                                                        | 1365                                                              | 2.34         | 337                                                                | 1.3         |
| Disruptive behaviour                                                                        | 1180                                                              | 2.03         | 330                                                                | 1.3         |
| Feeding disorder                                                                            | 788                                                               | 1.35         | 159                                                                | 0.6         |
| Substance use disorder                                                                      | 705                                                               | 1.21         | 129                                                                | 0.5         |
| Obsessive compulsive                                                                        | 579                                                               | 0.99         | 148                                                                | 0.6         |
| Bipolar disorder                                                                            | 389                                                               | 0.67         | 114                                                                | 0.4         |
| Schizophrenia                                                                               | 317                                                               | 0.54         | 62                                                                 | 0.2         |
| Somatic disorder                                                                            | 113                                                               | 0.19         | 15                                                                 | 0.1         |
| Other                                                                                       | 3373                                                              | 5.79         | 1412                                                               | 5.4         |
| <b>Total any diagnosis</b>                                                                  | <b>20547*</b>                                                     | <b>35.29</b> | <b>9578*</b>                                                       | <b>36.8</b> |
| <b>Total Young People</b>                                                                   | <b>58233</b>                                                      | <b>100</b>   | <b>26010</b>                                                       | <b>100</b>  |

Notes: \*Young people can have more than one primary diagnosis over their episode of care, so diagnoses do not sum to the total.

313 The most common treatment was cognitive behaviour therapy, comprising  
 314 31.23% of treatments. General or supportive counselling was next (12.53%), and then  
 315 acceptance and commitment therapy (5.47%).

316 **Table 4. Most common mental health treatment types.**

| Treatment type                                                                | % of treatments | N of treatments |
|-------------------------------------------------------------------------------|-----------------|-----------------|
| Cognitive behavioural therapy                                                 | 31.23           | 70690           |
| General or supportive counselling                                             | 12.53           | 28363           |
| Acceptance and commitment therapy                                             | 5.47            | 12384           |
| Psychoeducation                                                               | 4.79            | 10842           |
| Skills training (social and communication skills anger management)            | 3.32            | 7507            |
| Interpersonal therapy                                                         | 3.26            | 7385            |
| Motivational Interviewing/Enhancement                                         | 2.24            | 5072            |
| Behavioural interventions (including activity scheduling exposure techniques) | 2.20            | 4980            |
| Cognitive interventions (eg Cognitive analytic therapy)                       | 1.65            | 3732            |
| Problem solving therapy                                                       | 1.34            | 3022            |
| <b>Total treatments<sup>2</sup> delivered</b>                                 | NA <sup>1</sup> | <b>226307</b>   |
| <b>Median number of treatments recorded per young person</b>                  |                 | <b>2.00</b>     |

Notes: <sup>1</sup>% do not sum to 100 because young people can receive more than one service type and only the 10 most common treatment types are listed. <sup>2</sup>Service providers can record up to three treatment types per visit.

317 **Mean changes in outcomes over time**

318 The mean outcome scores at each time point (visit number) for young people  
319 who had received that number of sessions are plotted in Figures 2-4. The respective  
320 sample sizes show that the sample size declined dramatically with each time point.

321 For the K10, the strongest effect was the main effect for time, explaining  
322 7.51% of the variance. Other effects were significant but negligible (1.0% variance or  
323 less). When the 90-day follow-up was added, the time effect explained 12.43% of the  
324 variance. Note that while the follow-up sample was generally similar to the whole  
325 sample, they were more likely to be female, OR=2.00 (95% CI=1.73-2.23); and more  
326 likely to be older, OR=1.03 (95% CI=1.01-1.05).

327



328 **Fig 2. Mean psychological distress (K10) scores by time point and number of**  
329 **sessions.**

330

331 For SOFAS scores, again the time effect was strongest, although only  
332 explained 2.76% of the variance; no other sizeable effects were evident.

333

334 **Fig 3. Mean social and occupational functioning (SOFAS) scores by time point**  
335 **and number of sessions.**

336

337 For MLT, the time effect explained 11.73% of the variance, and age-group  
338 explained 2.08%.

339

340 **Fig 4. Mean quality of life (MLT) scores by time point and number of sessions.**

341

342 **Significant, reliable, and clinically significant change**

343 The percentage of young people showing significant, reliable, and clinically  
344 significant change from first to last rating are presented in Table 5. For psychological  
345 distress, just over one-third significantly, a quarter reliably and one-fifth clinically  
346 significantly improved, and 5.94% reliably deteriorated on the K10. For quality of  
347 life, MLT scores revealed just under half significantly improved and about 30% each  
348 showed reliable and clinically significant change; 5.03% had a reliable deterioration.  
349 According to clinician ratings, 36.12% significantly, 29.92% reliably and 37.81%  
350 clinically significantly improved in psychosocial functioning (SOFAS); 13.84%  
351 reliably declined.

352

353 **Table 5. Percentage of young people showing significant, reliable, and clinically**  
354 **significant change in outcomes from first to last service rating.**

| Outcome                            | Change method                 | N     | Change Category |             |                 |
|------------------------------------|-------------------------------|-------|-----------------|-------------|-----------------|
|                                    |                               |       | Improvement %   | No change % | Deterioration % |
| <b>K10</b>                         | Significant Change            | 22349 | 35.50           | 54.27       | 10.23           |
|                                    | Reliable Change               | 22349 | 24.53           | 69.53       | 5.94            |
|                                    | Clinically Significant Change | 17236 | 22.39           | 77.61       | NA <sup>1</sup> |
| <b>SOFAS</b>                       | Significant Change            | 24997 | 36.12           | 46.35       | 17.53           |
|                                    | Reliable Change               | 24997 | 29.92           | 56.24       | 13.84           |
|                                    | Clinically Significant Change | 15501 | 37.81           | 62.19       | NA <sup>1</sup> |
| <b>MLT</b>                         | Significant Change            | 22203 | 46.85           | 41.49       | 11.65           |
|                                    | Reliable Change               | 22203 | 30.05           | 64.92       | 5.03            |
|                                    | Clinically Significant Change | 17549 | 29.87           | 70.13       | NA <sup>1</sup> |
| <b>For any outcome<sup>2</sup></b> | Significant Change            | 21053 | 70.96           | 13.18       | 31.47           |
|                                    | Reliable Change               | 21053 | 56.35           | 29.39       | 21.49           |
|                                    | Clinically Significant Change | 10118 | 51.72           | 48.27       | NA <sup>1</sup> |

Notes: <sup>1</sup>Young people in the non-clinical population at first time (20.88% of 22349 for K10, 37.99% of 24997 for SOFAS, and 20.96% of the 22203 for MLT) are unable to make a clinically significant improvement and are therefore excluded. Young people in the clinical population are not able to deteriorate, but rather remain in the clinical population (so included in 'No change' category).

<sup>2</sup> For any of the three outcomes, the rows do not sum to 100% because young people can be in more than one category.

355 The K10, SOFAS and MLT measure different aspects of mental health; and  
356 psychological distress and quality of life are self-reported by young people, while  
357 social and occupational functioning is estimated by the clinician. The K10 and MLT  
358 are moderately strongly correlated at both first and last assessment:  $r=-0.65$  and  $0.64$ ,  
359 respectively. These measures both correlate weakly with SOFAS scores at first (K10  
360  $r=-0.23$ ; MLT  $r=-0.24$ ) and last (K10  $r=-0.29$ ; MLT  $r=-0.34$ ) assessment.

361            If all three measures are considered, 70.96% of young people significantly  
362 improved, 56.35% reliably improved, and 51.72% clinically significantly improved.  
363 There were 31.47% who significantly deteriorated on any outcome measure. A  
364 logistic regression, summarised in Table 6, comparing young people who improved  
365 with those who did not (significant improvement on at least one measure) showed that  
366 improvement was predicted by being male and attending a greater number of sessions  
367 (visits). Improvement was also predicted by greater distress (OR, 1.01: 95% CI, 1.01-  
368 1.02), lower psychosocial functioning (OR, 0.97: 95% CI, 0.96-0.97), and lower  
369 quality of life (OR, 0.99: 95% CI, 0.99-0.99) at baseline.  
370

371 **Table 6. Summary of logistic regression model predicting significant**  
372 **improvement on any outcome (K10, MLT or SOFAS).**

| Factor                               |                 | OR   | CI        | P      |
|--------------------------------------|-----------------|------|-----------|--------|
| Gender                               | Male            | 1.13 | 1.05-1.20 | 0.001  |
|                                      | Female (1)      |      |           |        |
| K10 baseline                         |                 | 1.01 | 1.01-1.02 | <0.001 |
| MLT baseline                         |                 | 0.99 | 0.99-0.99 | <0.001 |
| SOFAS baseline                       |                 | 0.97 | 0.96-0.97 | <0.001 |
| Number of mental health visits       |                 | 1.15 | 1.13-1.16 | <0.001 |
| Age                                  | 12-14 years     | 0.97 | 0.88-1.06 | 0.46   |
|                                      | 15-17 years     | 0.90 | 0.82-0.98 | 0.02   |
|                                      | 18-20 years     | 0.95 | 0.87-1.05 | 0.32   |
|                                      | 21-25 years (1) |      |           |        |
| Primary presenting concern:          |                 |      |           |        |
| Anxiety                              |                 | 1.05 | 0.94-1.16 | 0.39   |
| Depression                           |                 | 1.01 | 0.91-1.13 | 0.81   |
| Anger                                |                 | 1.11 | 0.96-1.30 | 0.17   |
| Stress                               |                 | 1.04 | 0.89-1.21 | 0.66   |
| Suicidal                             |                 | 1.10 | 0.85-1.41 | 0.48   |
| Difficulty in personal relationships |                 | 1.20 | 0.97-1.49 | 0.09   |
| Attention deficit/behavioural        |                 | 1.12 | 0.84-1.48 | 0.45   |
| Conflict                             |                 | 0.98 | 0.79-1.21 | 0.83   |
| Borderline personality traits        |                 | 0.71 | 0.52-0.99 | 0.04   |
| Eating disorder                      |                 | 0.71 | 0.52-0.97 | 0.03   |

Notes: (1) Indicates reference group. Overall  $X^2 [5] = 1473.23$ , Nagelkerke R square=0.098

## 373 Discussion

374 Our aim was to examine outcomes for headspace centre clients after 16 years  
375 of implementation and expansion of the network to 108 services, thereby making the  
376 outcomes attained transparent to the Australian community and providing  
377 comparative data for similar international initiatives. The results are generally  
378 comparable to the client outcomes reported in 2015 [15], although the number of  
379 centres has more than doubled since then along with the number of clients receiving  
380 services within the 12-month analysis period.

381           Interestingly, anxiety symptoms were the most common primary presenting  
382 issue in 2019-2020 followed by depressive symptoms, whereas the opposite order was  
383 evident in 2015. The high prevalence of anger issues for 12-14 year-old boys has  
384 remained as their second most common main presenting issue. This shows a need to  
385 focus on this particular form of mental distress for the youngest boys accessing  
386 headspace. Other headspace research confirms that early adolescent boys appear to be  
387 quite a distinct group with unique needs [20].

388           We reveal that only about one-third of headspace centre clients had a  
389 diagnosis, but 25.64% had risk factors present and 21.01% had sub-syndromal mental  
390 health conditions, reflecting the early intervention focus of headspace centres, which  
391 aim to intervene before symptoms have reached diagnostic thresholds. This also likely  
392 reflects that headspace service providers are primarily allied health workers, mostly  
393 psychologists, many of whom work within a non-diagnostic practice framework.  
394 Primary diagnoses were consistent with presenting issues, showing a preponderance  
395 of anxiety and depression. Many other diagnoses were evident, however, albeit with  
396 much lower frequency, showing the breadth of presentations that headspace centres  
397 must be equipped to address.

398           This breadth of presentations, in terms of issues and severity, necessitates  
399 multidimensional outcome measures to be used. The inclusion in this study of MLT as  
400 a quality of life measure is especially important considering that different domains of  
401 young people's lives can be both influenced by and determinants of their mental  
402 health status. Our results show that 70.96% of headspace clients improved on at least  
403 one of the three outcome measures. The quality of life measure shows the greatest  
404 proportion improving (46.85%) supporting the promotion of headspace centres as  
405 easy access facilities for any type of problem, and the value of a broad patient-

406 reported outcome measure tapping domains of life that are of concern for young  
407 people—specifically, their overall wellbeing, relationships with friends and family,  
408 day-to-day functioning in work/study/leisure activities, and general coping with life  
409 capacity.

410 By necessity, the current study used a single-arm, observational design;  
411 consequently, a limitation is the lack of a control group. An equivalent control group  
412 has not been able to be determined by any of the external evaluations. Comparative  
413 data, in general, are difficult to find, because headspace clients present for a wide  
414 range of reasons, treatments are varied, and centres are uniquely adapted to their  
415 varied communities and circumstances. Consequently, few other services are  
416 comparable. Recent systematic reviews and meta-analyses of psychological  
417 treatments for depression in children and adolescents report that 60% of youth  
418 receiving therapy do not respond within two months, and that 39% respond in  
419 treatment conditions and 24% in control conditions [24]. For adults, almost 60% do  
420 not respond to treatment, 41% respond within two months, and 17% respond in  
421 control conditions [25]. These findings come from rigorous randomised controlled  
422 trials and only consider psychological treatments for depression, so do not provide  
423 direct comparators for headspace; but, given that one of the main presenting issues for  
424 headspace clients is depression, they do provide a reference point. The reviews also  
425 support the contention that the effects of psychotherapies for depression are smaller in  
426 children and adolescents than in adults.

427 Recently, information has begun to be reported internationally for other  
428 primary care, youth mental health initiatives similar to headspace. For example, the  
429 evolution of Jigsaw in Ireland [26] and early learnings from the Foundry in Canada

430 [27] have been described. No outcome data are yet available, although a study  
431 protocol for the Canadian Access Open Minds youth services has been published [28].

432 Another limitation is that our results are likely to underestimate treatment  
433 effects because the outcome data are collected at the last recorded data point, which  
434 for some young people is not at the completion of their treatment. Further, data are  
435 collected as the client presents for their treatment session rather than at the end of the  
436 session.

437 Our follow-up rate is unsurprisingly disappointing, although the results  
438 suggest that young people continue to improve after leaving the service. It is a major  
439 challenge to get young people to complete follow-up information after they have left a  
440 service, particularly through routine data collection (as opposed to a well-resourced  
441 research project). Nevertheless, there was a large number of young people who  
442 provided 90-day follow-up data, if only a very small percentage. The follow-up  
443 sample is skewed towards those who are female, but does show maintenance of  
444 outcomes for reduced psychological distress. Unfortunately, MLT was not available at  
445 follow-up for these analyses, but has more recently been included in the follow-up  
446 data protocol.

447 The impact of COVID-19 has had many unfortunate impacts on most people,  
448 including headspace young people and particularly on data collection. Most  
449 headspace centre services had to rapidly change to online delivery after March 2020,  
450 and many centres had long periods where no in-person services were possible due to  
451 lockdowns. This had a major impact on data collection, which was previously  
452 undertaken while the young person was waiting in-person for their occasion of  
453 service. Online service delivery meant online data collection, and although centres  
454 were able to adapt to incorporate this, it has proved more challenging for data

455 compliance. Hence, the data reported here are for the period immediately prior to the  
456 impacts of COVID-19.

457

458 headspace is committed to examining and reporting outcomes for young  
459 people accessing its services. We will continue to use our MDS to contribute to the  
460 well-acknowledged complex challenge of what works for young people, particularly  
461 for the common presentations of anxiety and depression [29], which are the main  
462 issues for young people coming to headspace. These latest centre results show a  
463 positive impact, particularly when considering multiple outcome measures, which we  
464 argue is needed to match the holistic early intervention intent of headspace services.  
465 In particular, MLT measures outcomes directly relevant to young people's lives, and  
466 it is validating that these items demonstrate the strongest improvement.

467 Nevertheless, there remain many young people for whom the services  
468 currently provided by headspace are not sufficient, and further research is required to  
469 identify how the outcomes for these young people can be improved. In particular,  
470 young people who have been referred to as the 'missing middle' [30] present to  
471 headspace centres as a result of their easy access, 'no-wrong-door' approach. These  
472 young people are likely to be too complex and their issues too severe for the  
473 headspace indicated prevention focus; headspace centres were originally intended for  
474 mild to moderate presentations of high prevalence conditions. Due to the lack of  
475 appropriate services in most communities and the high visibility and youth-  
476 friendliness of headspace centres, young people with more challenging presentations  
477 than first anticipated are attending. Centres increasingly must hold young people with  
478 more acute, complex and enduring mental health problems, despite not being  
479 designed nor resourced to do so. Providing services to these young people may



480 attenuate the outcomes achieved. Consequently, identifying and analysing outcomes  
481 for more complex headspace clients is a future research need.

482 In conclusion, the current study shows that Australia's headspace initiative,  
483 which has been at the forefront of youth mental health service reform and provides an  
484 exemplar internationally, is achieving important outcomes for the majority of young  
485 people who attend, providing a much-needed reoriented service response to address  
486 the high and rising prevalence of mental health problems for young people in their  
487 adolescent and early adult years.

488

## 489 **Acknowledgements**

490 None.

491

## 492 **References**

- 493 1. Monaco AP. An epigenetic, transgenerational model of increased mental health  
494 disorders in children, adolescents and young adults. *European Journal of Human  
495 Genetics*. 2021;29(3):387-95. doi: 10.1038/s41431-020-00726-4.
- 496 2. Ford T, John A, Gunnell D. Mental health of children and young people during  
497 pandemic. *BMJ*. 2021;372:n614. doi: 10.1136/bmj.n614.
- 498 3. McGorry PD, Goldstone SD, Parker AG, Rickwood DJ, Hickie IB. Cultures for  
499 mental health care of young people: an Australian blueprint for reform. *Lancet  
500 Psychiatry*. 2014;1(7):559-68. doi: 10.1016/S2215-0366(14)00082-0.
- 501 4. McGorry PD, Tanti C, Stokes R, Hickie IB, Carnell K, Littlefield LK, et al.  
502 headspace: Australia's National Youth Mental Health Foundation - where young

- 503 minds come first. Medical Journal of Australia. 2007;187:S68-S70. doi:  
504 10.5694/j.1326-5377.2007.tb01342.x.
- 505 5. headspace National. helping young people get through challenging times:  
506 headspace year in review 2020-2021 Melbourne: headspace National Youth  
507 Mental Health Foundation; 2021. Available from:  
508 [https://headspace.org.au/assets/Reports/headspace-Year-in-Review-2020-](https://headspace.org.au/assets/Reports/headspace-Year-in-Review-2020-2021.pdf)  
509 [2021.pdf](https://headspace.org.au/assets/Reports/headspace-Year-in-Review-2020-2021.pdf)
- 510 6. McGorry PD, Mei C, Chanen A, Hodges C, Alvarez-Jimenez M, Killackey E.  
511 Designing and scaling up integrated youth mental health care. World Psychiatry.  
512 2022;21(1):61-76. doi: 10.1002/wps.20938.
- 513 7. headspace National. headspace Strategic Plan 2021-2024 Melbourne: headspace  
514 National; 2021. Available from: [https://headspace.org.au/assets/headspace-](https://headspace.org.au/assets/headspace-Strategy-2021-2024.pdf)  
515 [Strategy-2021-2024.pdf](https://headspace.org.au/assets/headspace-Strategy-2021-2024.pdf).
- 516 8. Gulliver A, Griffiths KM, Christensen H. Perceived barriers and facilitators to  
517 mental health help-seeking in young people: A systematic review. BMC  
518 Psychiatry. 2010;10(1):1-9. doi: 10.1186/1471-244x-10-113.
- 519 9. Rickwood D, Paraskakis M, Quin D, Hobbs N, Ryall V, Trethowan J, et al.  
520 Australia's innovation in youth mental health care – the headspace centre model.  
521 Early Intervention in Psychiatry. 2018;13:159-66. doi: 10.1111/eip.12740.
- 522 10. Muir K, Powell A, Patulny R, Flaxman S, McDermott S, Oprea I, et al.  
523 Independent evaluation of headspace: the National Youth Mental health  
524 Foundation Sydney: Social Policy Research Centre, University of New South  
525 Wales; 2009. Available from:  
526 [https://headspace.org.au/assets/Uploads/Corporate/Publications-and-](https://headspace.org.au/assets/Uploads/Corporate/Publications-and-research/final-independent-evaluation-of-headspace-report.pdf)  
527 [research/final-independent-evaluation-of-headspace-report.pdf](https://headspace.org.au/assets/Uploads/Corporate/Publications-and-research/final-independent-evaluation-of-headspace-report.pdf).

- 528 11. Hilferty F, Cassells R, Muir K, Duncan A, Christensen D, Mitrou F, et al. Is  
529 headspace making a difference to young people's lives? Final Report of the  
530 independent evaluation of the headspace program Sydney2015. Available from:  
531 <https://headspace.org.au/assets/Uploads/Evaluation-of-headspace-program.pdf>.
- 532 12. Bassilios B, Telford, N., Rickwood, D., Spittal, M.J., & Pirkis, J. Complementary  
533 primary mental health programs for young people in Australia: Access to Allied  
534 Psychological Services (ATAPS) and headspace. *International Journal of Mental  
535 Health Systems*. 2017;11(1):19. doi: 10.1186/s13033-017-0125-7.
- 536 13. Rickwood DJ, Telford NR, Parker AG, Tanti C, McGorry PD.  
537 headspace—Australia's innovation in youth mental health: Who's coming and  
538 why do they present? *Medical Journal of Australia*. 2014;200 (2):108-11. doi:  
539 10.5694/mja13.11235.
- 540 14. Rickwood DJ, Telford NR, Mazzer KR, Parker AG, Tanti C, McGorry PD.  
541 Services provided to young people through the headspace centres across  
542 Australia. *Medical Journal of Australia*. 2015;202(10):533-6. doi:  
543 10.5694/mja14.01695.
- 544 15. Rickwood DJ, Telford NR, Mazzer K, Parker AG, Tanti CP, McGorry PD.  
545 Changes in psychological distress and psychosocial functioning for young people  
546 accessing headspace centres for mental health problems. *Medical Journal of  
547 Australia*. 2015;202(10):573-42. doi: 10.5694/mja14.01696.
- 548 16. Kwan B, Rickwood DJ. A systematic review of mental health outcome measures  
549 for young people aged 12 to 25 years. *BMC Psychiatry*. 2015;15(1). doi:  
550 10.1186/s12888-015-0664-x.
- 551 17. Kessler R, Andrews G, Colpe L, Hiripi E, Mroczek D, Normand S, et al. Short  
552 screening scales to monitor population prevalences and trends in non-specific

- 553            psychological distress. *Psychological Medicine*. 2002;32:959-76. doi:  
554            10.1017/s0033291702006074.
- 555    18. Goldman HH, Skodol AE, Lave TR. Revising Axis V for DSM-IV: A review of  
556            measures of social functioning. *American Journal of Psychiatry*. 1992;149:1148–  
557            56. doi: 10.1176/ajp.149.9.1148.
- 558    19. Kwan B, Rickwood DJ, Telford NR. Development and validation of  
559            MyLifeTracker: A routine outcome measure for youth mental health. *Psychology  
560            Research and Behavior Management*. 2018;11. doi: 10.2147/PRBM.S152342.
- 561    20. Kwan B, Rickwood DJ. A routine outcome measures for youth mental health:  
562            Clinically interpreting MyLifeTracker. *Early Intervention in Psychiatry*. 2020.  
563            doi: 10.1111/eip.13016.
- 564    21. headspace. headspace Primary Program Minimum Data Set - Version 3.3.  
565            Melbourne: headspace National Youth Mental Health Foundation, 2020.
- 566    22. Wolpert M, Görzig, A., Deighton, J., Fugard, A.J.B., Newman, R., & Ford, T.  
567            Comparison of indices of clinically meaningful change in child and adolescent  
568            mental health services: difference scores, reliable change, crossing clinical  
569            thresholds and 'added value' - an exploration using parent rated scores on the  
570            SDQ. *Child and Adolescent Mental Health*. 2014. Epub Early view. doi:  
571            10.1111/camh.12080.
- 572    23. Jacobson NS, Truax P. Clinical significance: A statistical approach to defining  
573            meaningful change in psychotherapy research. *Journal of Consulting and Clinical  
574            Psychology*. 1991;59(1):12-9. doi: 10.1037/0022-006X.59.1.12.
- 575    24. Cuijpers P, Karyotaki E, Ciharova M, Miguel C, Noma H, Stikkelbroek Y, et al.  
576            The effects of psychological treatments of depression in children and adolescents  
577            on response, reliable change, and deterioration: a systematic review and meta-

- 578 analysis. *European Child & Adolescent Psychiatry*. 2021. doi: 10.1007/s00787-  
579 021-01884-6.
- 580 25. Cuijpers P, Karyotaki, E., Ciharova, M., Miguel, C., Noma, H., & Furukawa,  
581 T.A. The effects of psychotherapies for depression on response, remission,  
582 reliable change, and deterioration: A meta-analysis. *Acta Psychiatrica*  
583 *Scandinavica*. 2021. doi: 10.1111/acps.13335.
- 584 26. O'Reilly A, O'Brien G, Moore J, Duffy J, Longmore P, Cullinan S, et al.  
585 Evolution of Jigsaw - a National Youth Mental Health Service. *Early*  
586 *Intervention in Psychiatry*. 2021. doi: 10.1111/eip.13218.
- 587 27. Mathias S, Tee K, Helfrich W, Gerty K, Chan G, Barbic SP. Foundry: Early  
588 learnings from the implementation of an integrated youth service network. *Early*  
589 *Intervention in Psychiatry*. 2021. doi: 10.1111/eip.13181.
- 590 28. Iyer SN, Shah J, Boksa P, Lal S, Joobar R, Andersson N, et al. A minimum  
591 evaluation protocol and stepped-wedge cluster randomized trial of ACCESS  
592 Open Minds, a large Canadian youth mental health services transformation  
593 project. *BMC Psychiatry*. 2019;19(1):273. doi: 10.1186/s12888-019-2232-2.
- 594 29. Sebastian CL, Pote I, Wolpert M. Searching for active ingredients to combat  
595 youth anxiety and depression. *Nature Human Behaviour*. 2021. doi:  
596 10.1038/s41562-021-01195-5.
- 597 30. Orygen. Defining the missing middle Melbourne: Orygen Youth Health; 2021.  
598 Available from: [https://www.orygen.org.au/Policy/Policy-Areas/Government-](https://www.orygen.org.au/Policy/Policy-Areas/Government-policy-service-delivery-and-workforce/Service-delivery/Defining-the-missing-middle/orygen-defining-the-missing-middle-pdf.aspx?ext=)  
599 [policy-service-delivery-and-workforce/Service-delivery/Defining-the-missing-](https://www.orygen.org.au/Policy/Policy-Areas/Government-policy-service-delivery-and-workforce/Service-delivery/Defining-the-missing-middle/orygen-defining-the-missing-middle-pdf.aspx?ext=)  
600 [middle/orygen-defining-the-missing-middle-pdf.aspx?ext=.](https://www.orygen.org.au/Policy/Policy-Areas/Government-policy-service-delivery-and-workforce/Service-delivery/Defining-the-missing-middle/orygen-defining-the-missing-middle-pdf.aspx?ext=)

601

## 602 **Supporting information**

- 603 S1\_Fig Fig 1. Number of clients by each data selection process.
- 604 S2\_Fig Fig 2. Mean psychological distress (K10) scores by time point and number of  
605 sessions.
- 606 S3\_Fig Fig 3. Mean social and occupational functioning (SOFAS) scores by time  
607 point and number of sessions.
- 608 S4\_Fig Fig 4. Mean quality of life (MLT) scores by time point and number of  
609 sessions.
